# Supplementary material for: Air Quality outside Schools in Newcastle upon Tyne, UK: An Investigation into NO2 and PM Concentrations and PM Respiratory Deposition
Source: MDPI journal article supplement (doi:10.3390/atmos13020172), 2022-01-21
Supplement: s1 [file s1]

Archive with 1 entries (1 files):
- atmosphere-1546103-supplementary.pdf
